# Supplementary material for: Semisynthesis and Pesticidal Activities of Novel Cholesterol Ester Derivatives Containing Cinnamic Acid-like Fragments
Source: MDPI journal article supplement (doi:10.3390/molecules27238437), 2022-12-02

# Supporting Information

## **Semisynthesis and Pesticidal Activities of Novel Cholesterol Esters Derivatives Containing Cinnamic Acids-Like Fragments**

Rongfei Lu,<sup>1,#</sup> Jianwei Xu,<sup>1,#</sup> Hailong Wang,<sup>3</sup> Zhen Wang,<sup>1</sup> Shaoyong Zhang,<sup>2</sup> Hui Xu,<sup>1,\*</sup> and Min Lv<sup>1,\*</sup>

<sup>1</sup>College of Plant Protection, Northwest A&F University, Yangling 712100, Shaanxi Province, P.R. China

<sup>2</sup>Key Laboratory of Vector Biology and Pathogen Control of Zhejiang Province, College of Life Science, Huzhou University, Huzhou 313000, Zhejiang Province, P.R. China

<sup>3</sup>Yan'an Institute of Agricultural Sciences, Yan'an 716000, Shaanxi Province, P.R. China

\*Correspondence: [orgxuhui@nwsuaf.edu.cn](mailto:orgxuhui@nwsuaf.edu.cn); [lvmin@nwsuaf.edu.cn](mailto:lvmin@nwsuaf.edu.cn)

#These authors contributed equally to this work.

# $^1\text{H}$ NMR spectra

compound **2a**

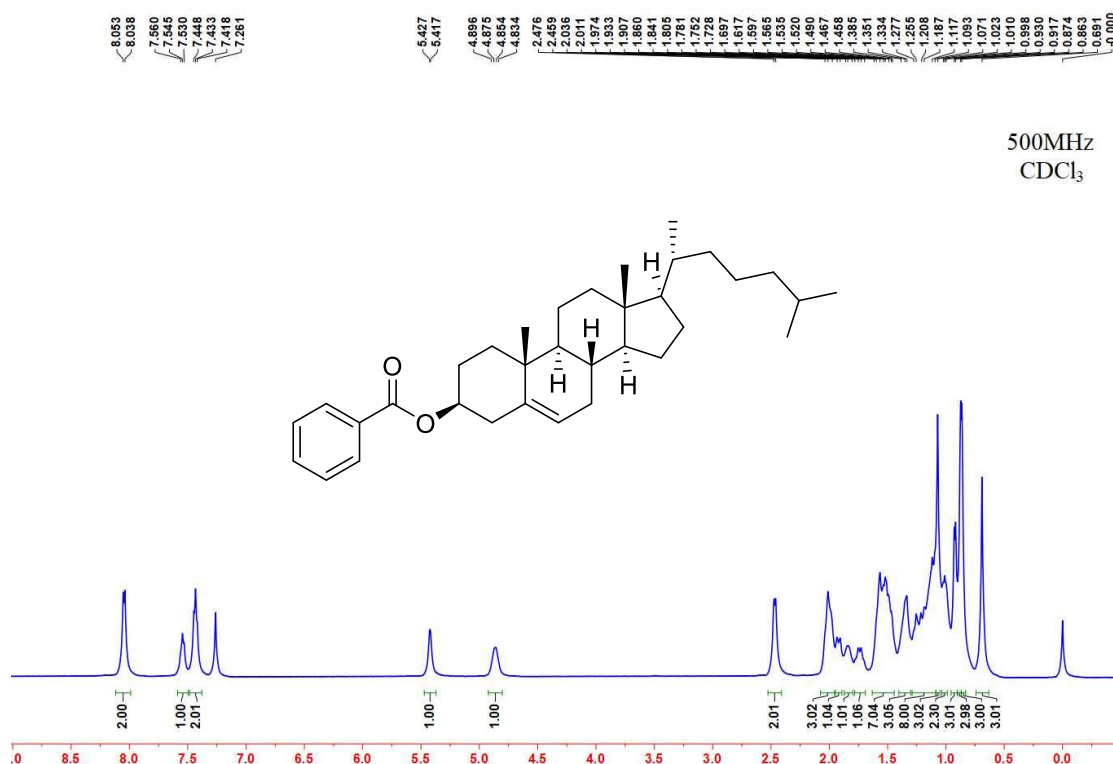

compound **2b**

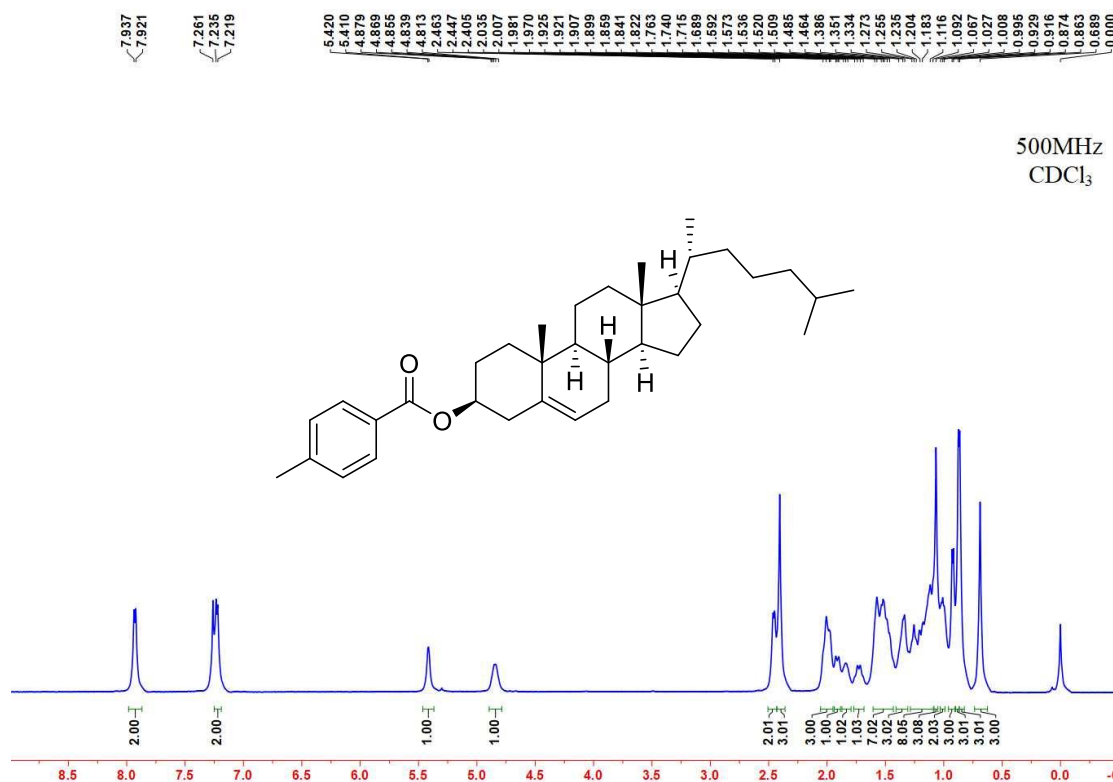

compound **3a**

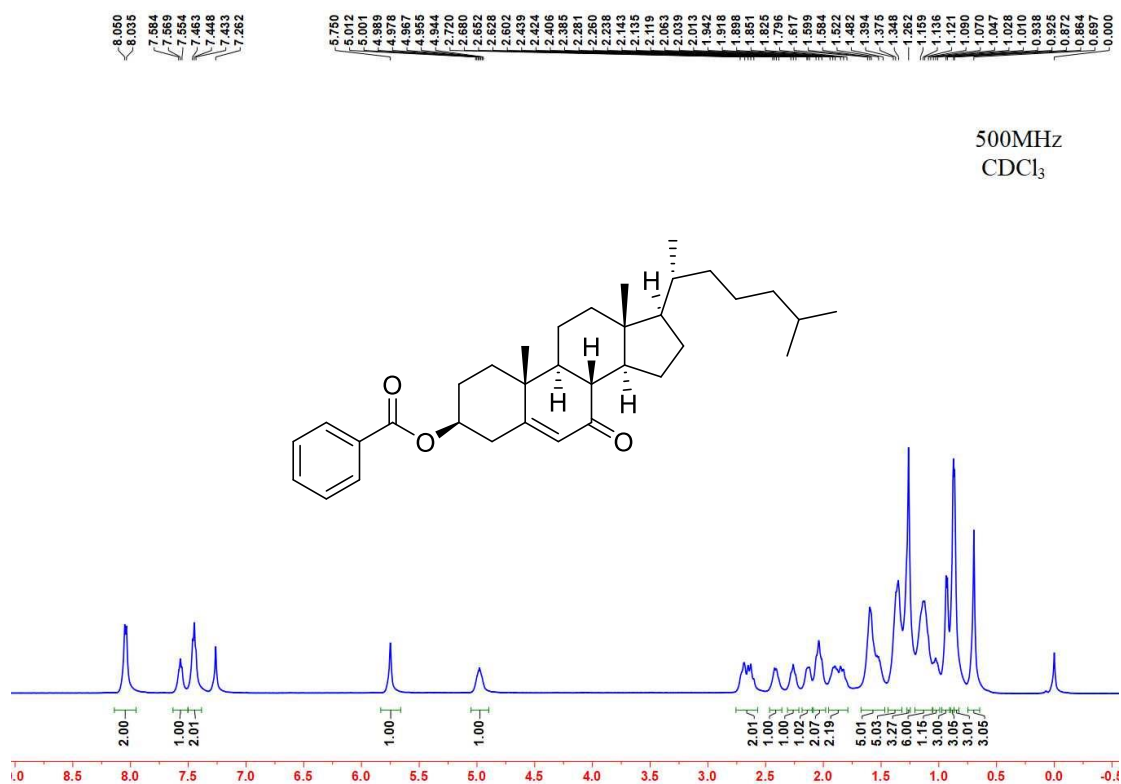

compound **3b**

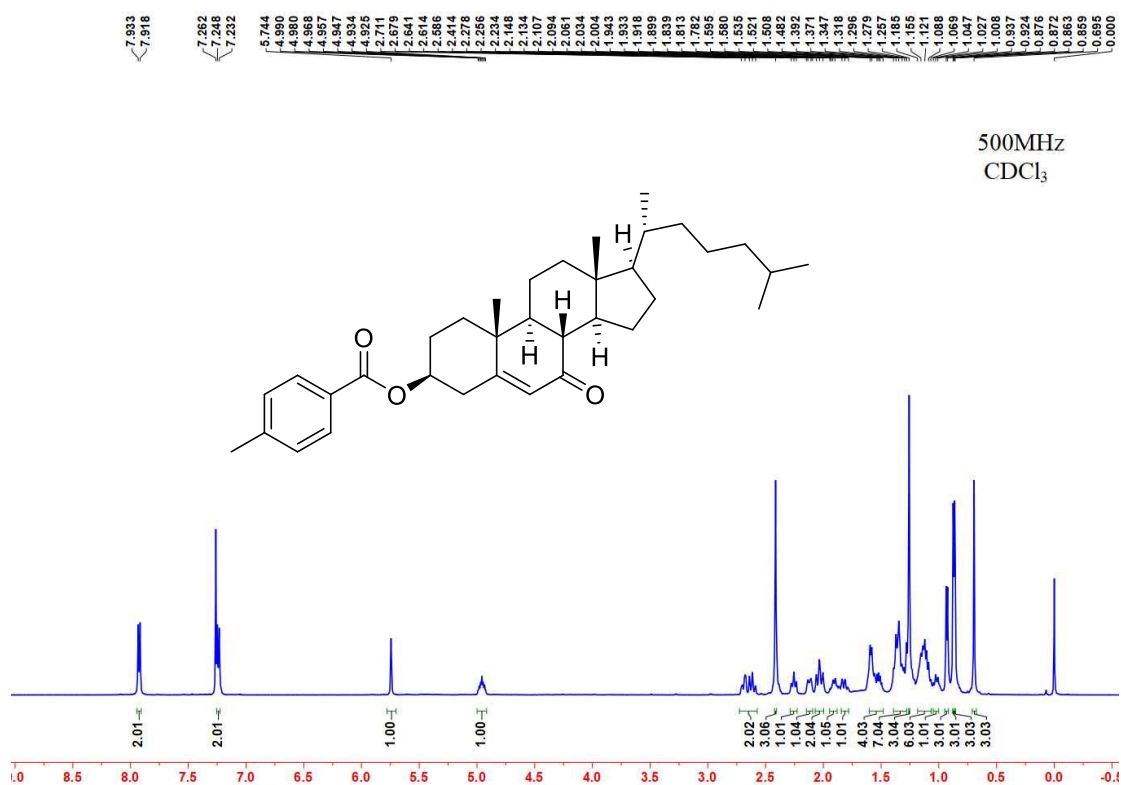

compound **4a**

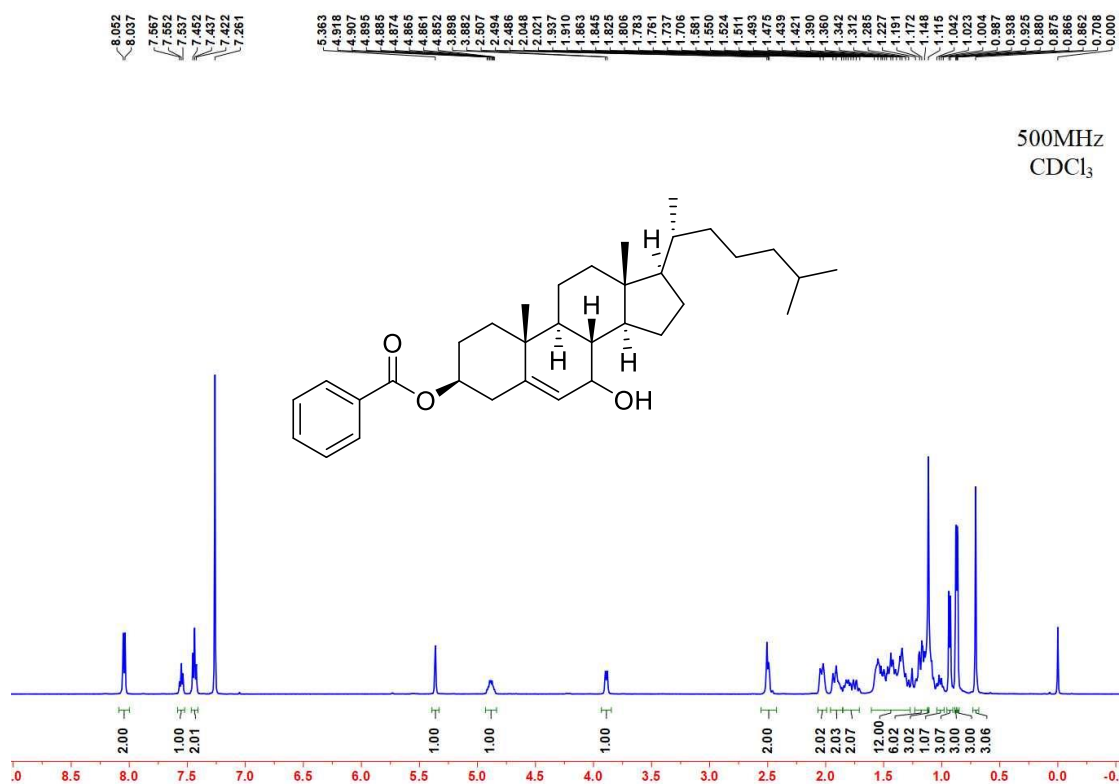

compound **4b**

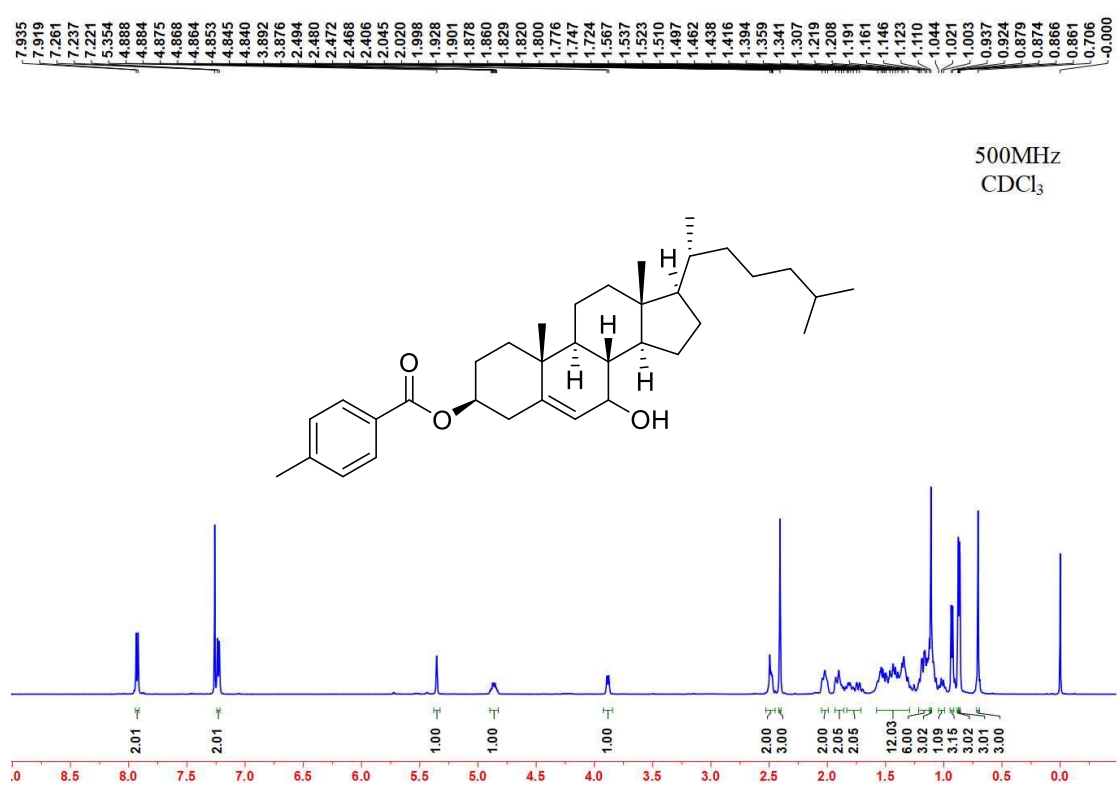

compound ***Ia***

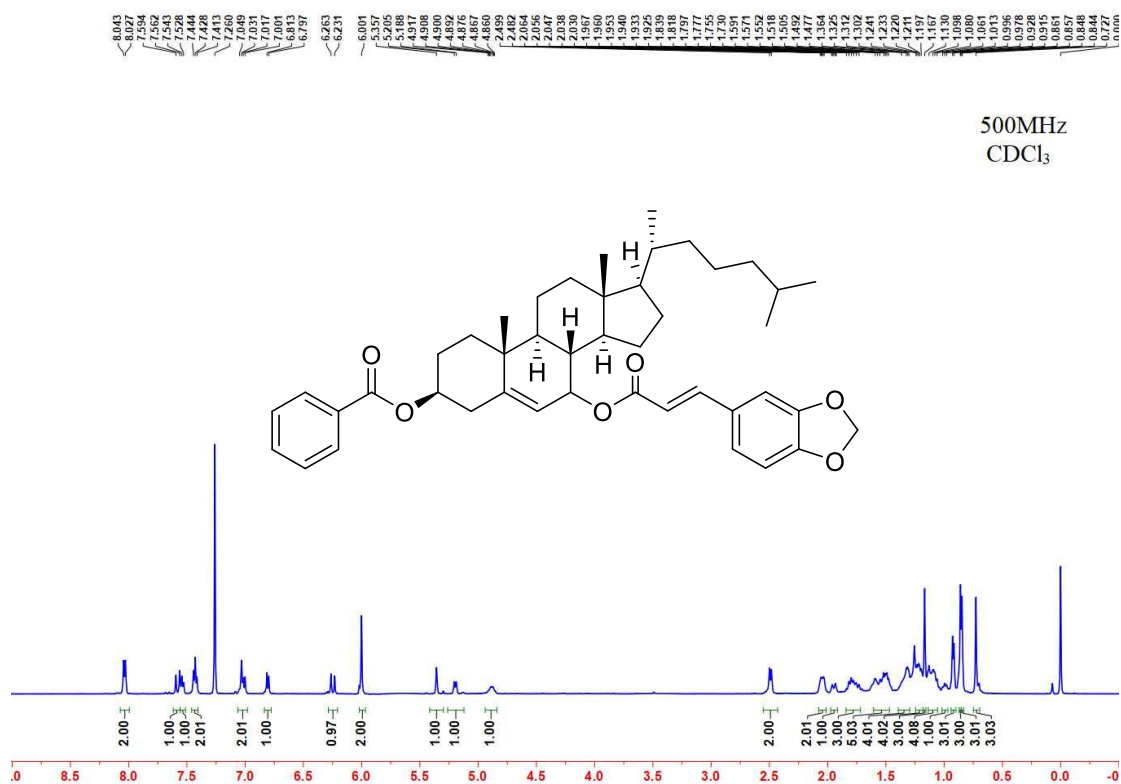

compound ***Ib***

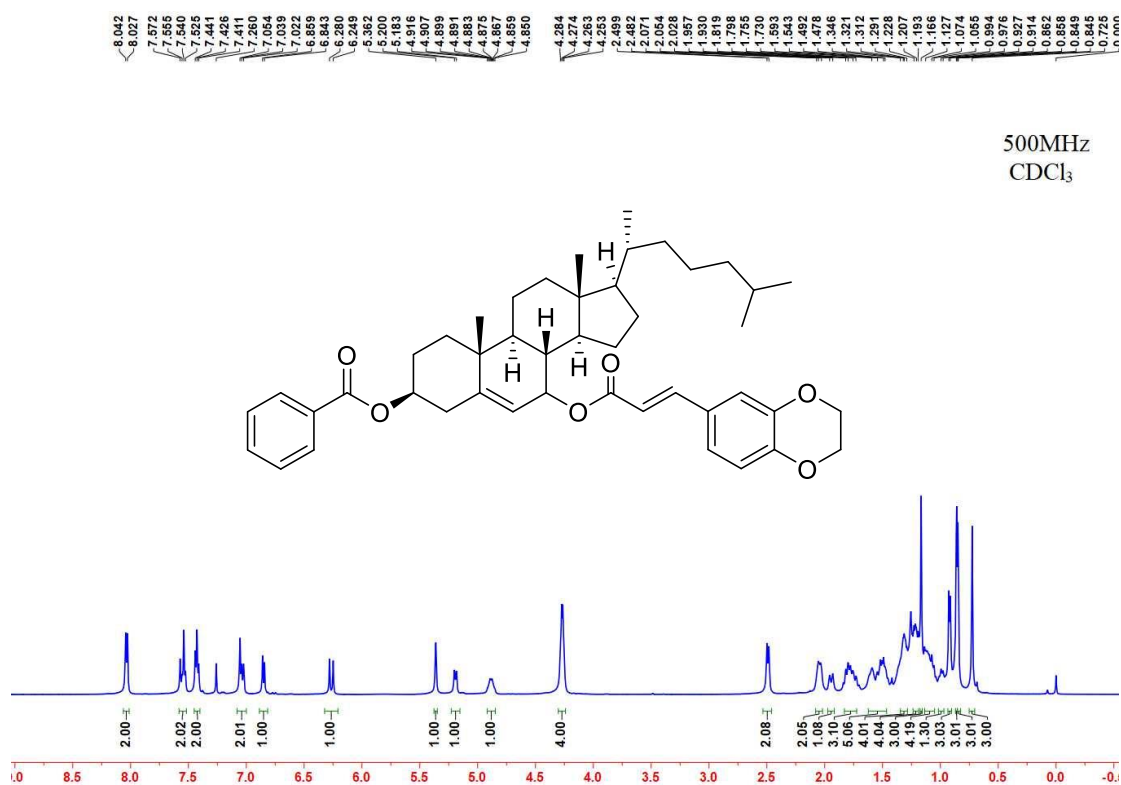

compound *Ic*

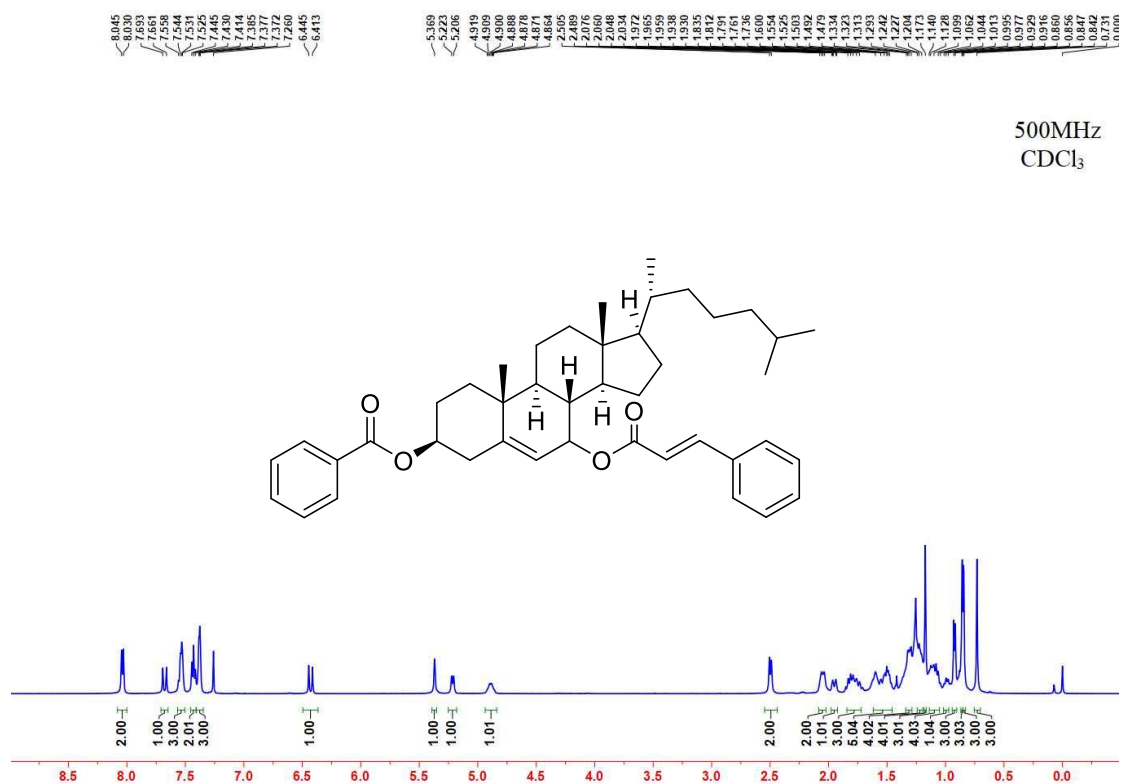

compound *Id*

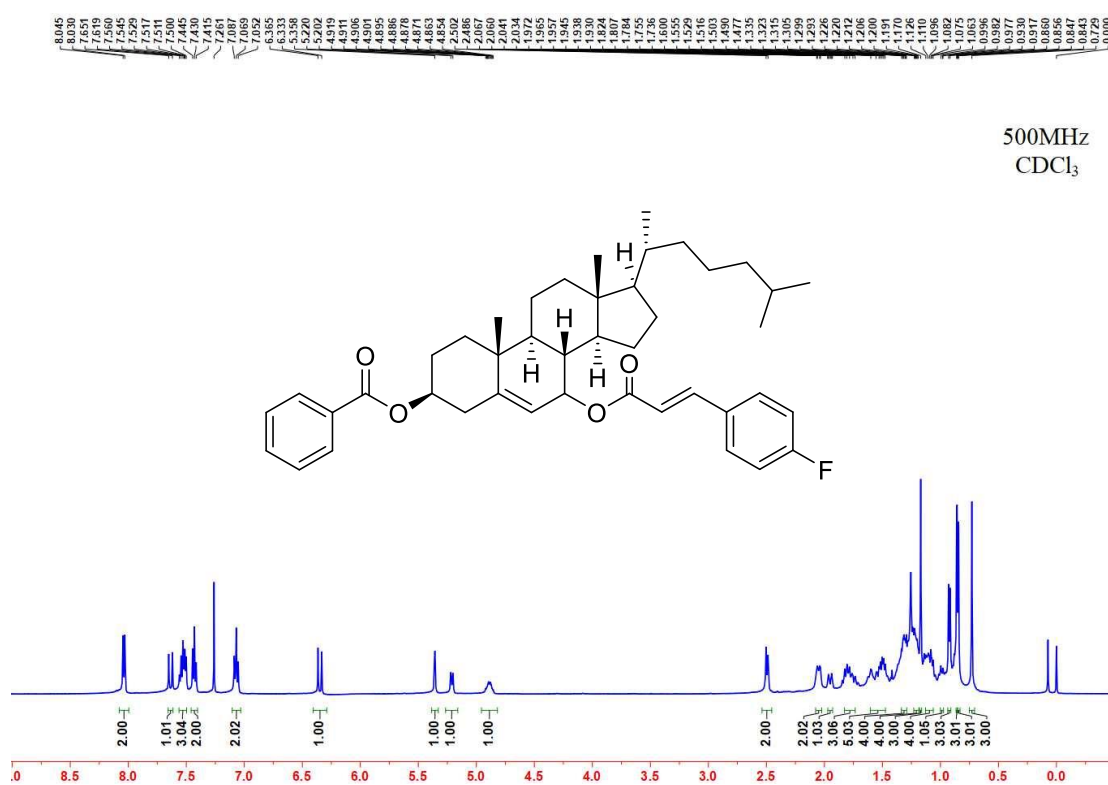

compound *Ie*

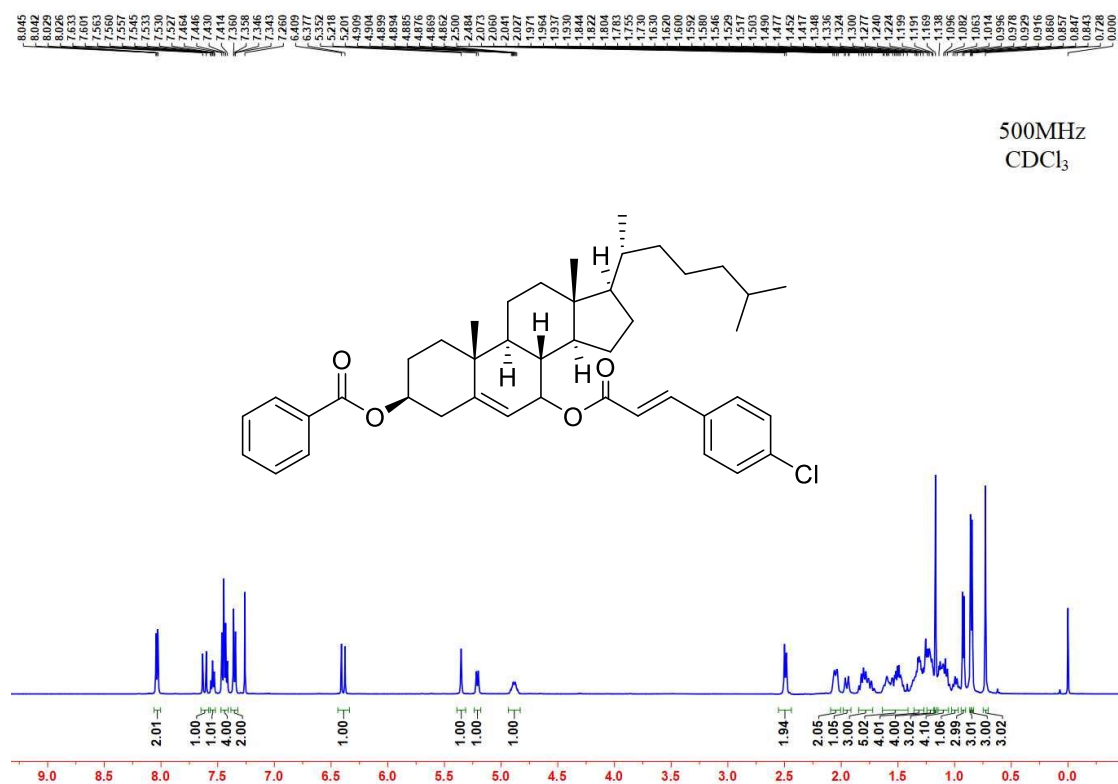

compound *If*

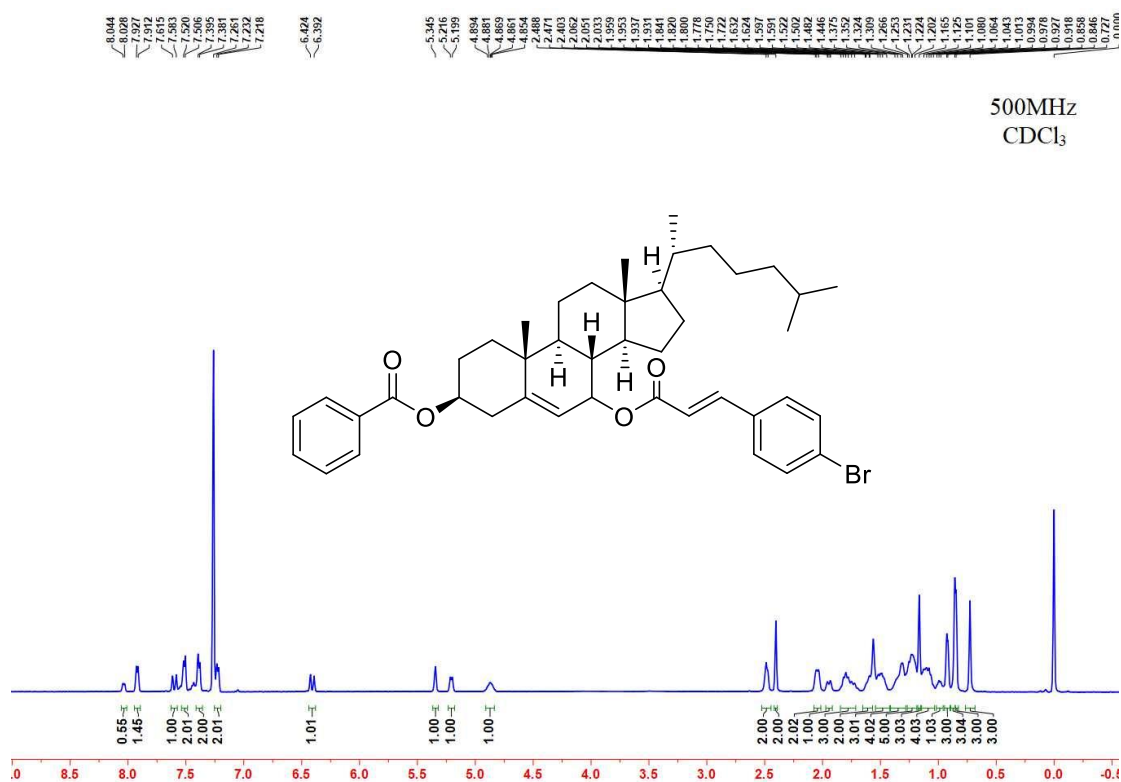

compound **Ig**

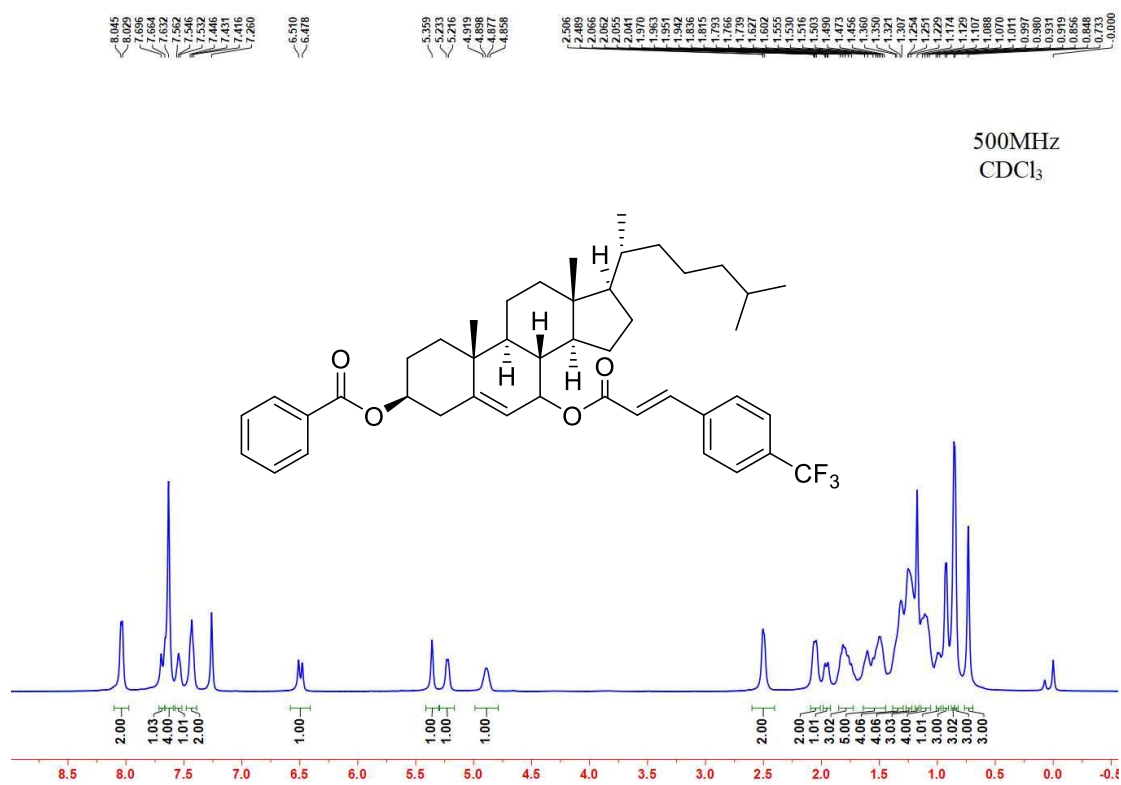

compound **Ih**

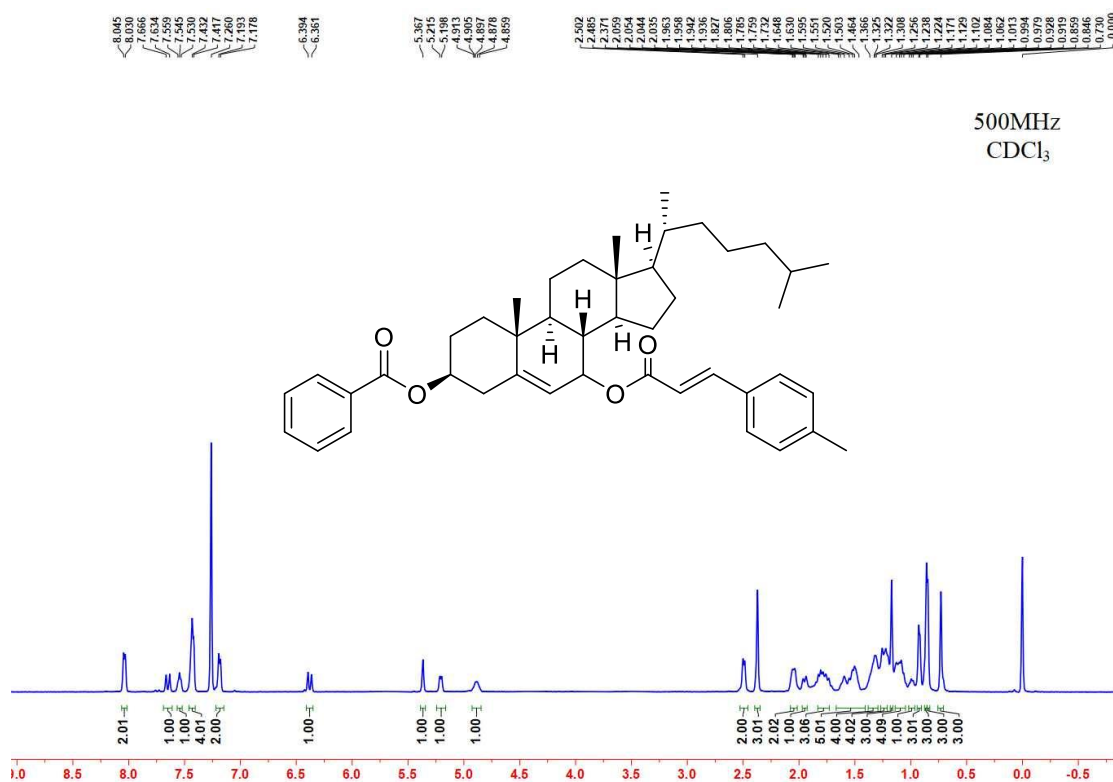



compound *Ii*

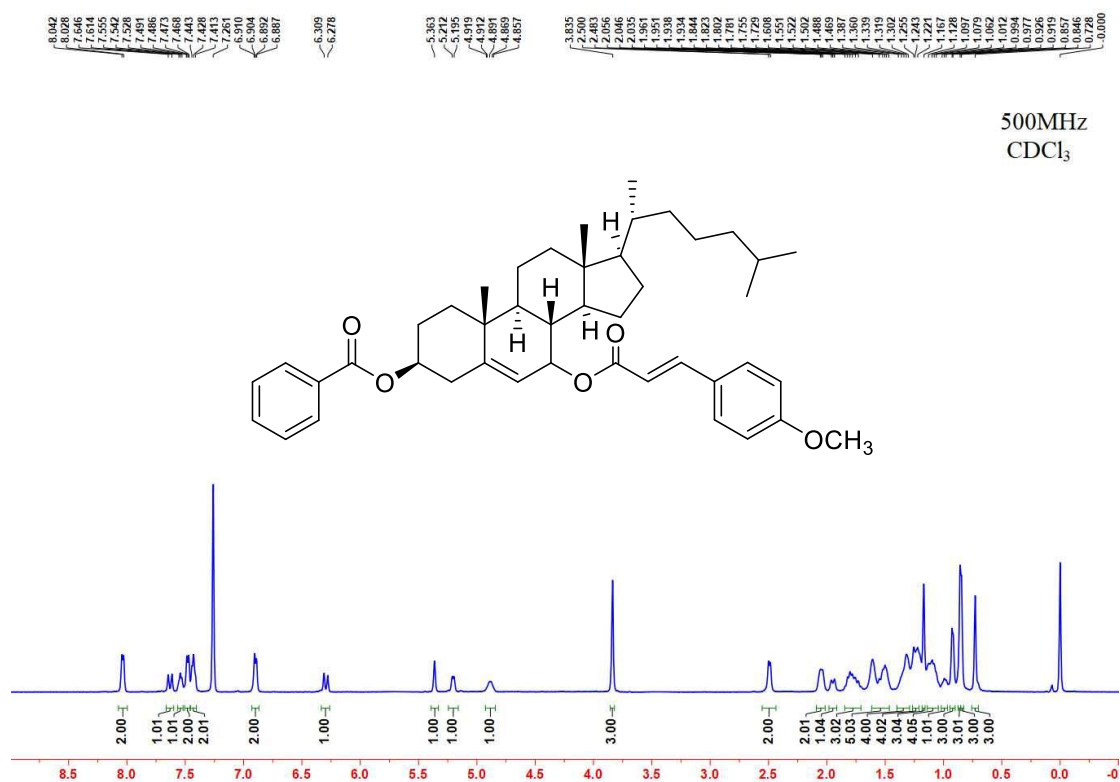

compound *Iia*

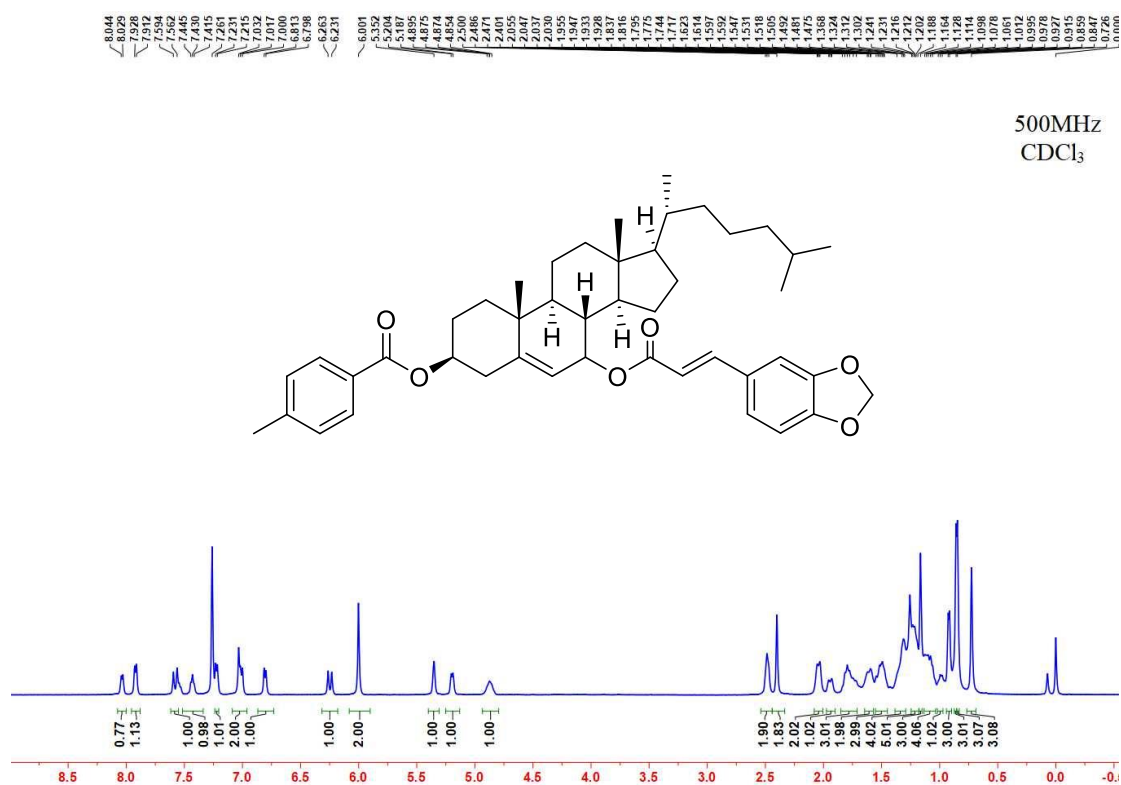

compound *IIIb*

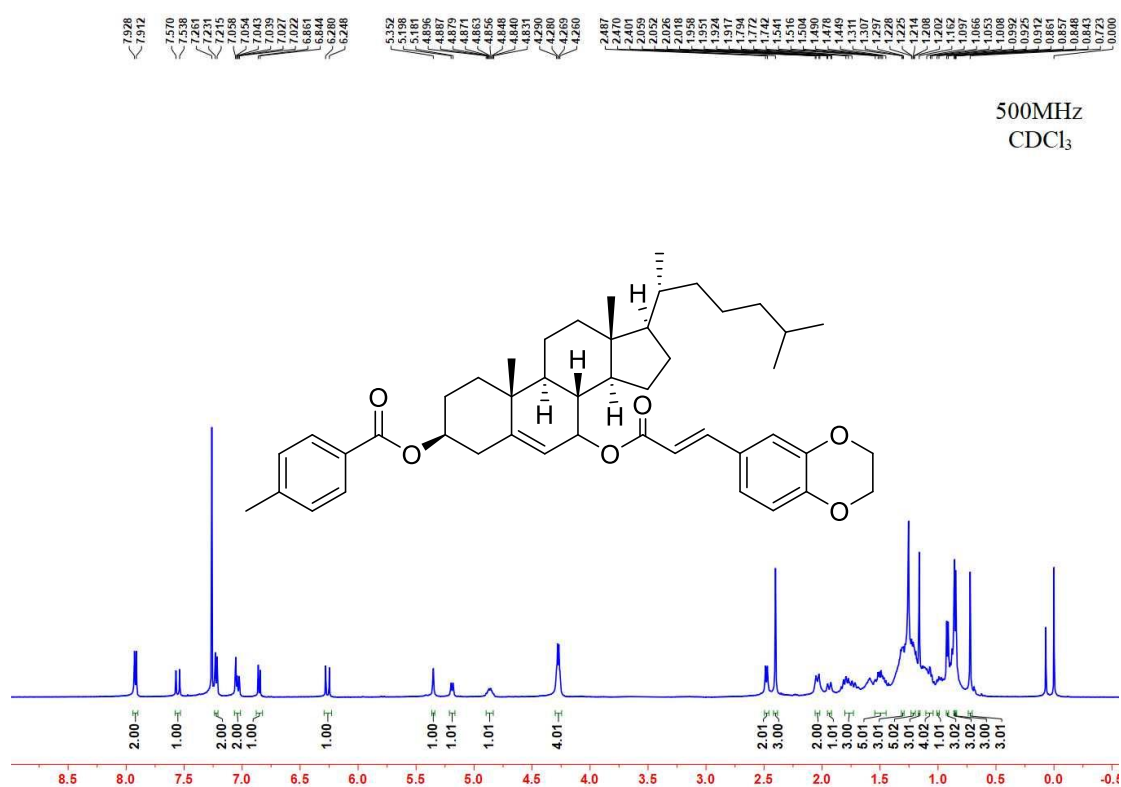

compound *IIIc*

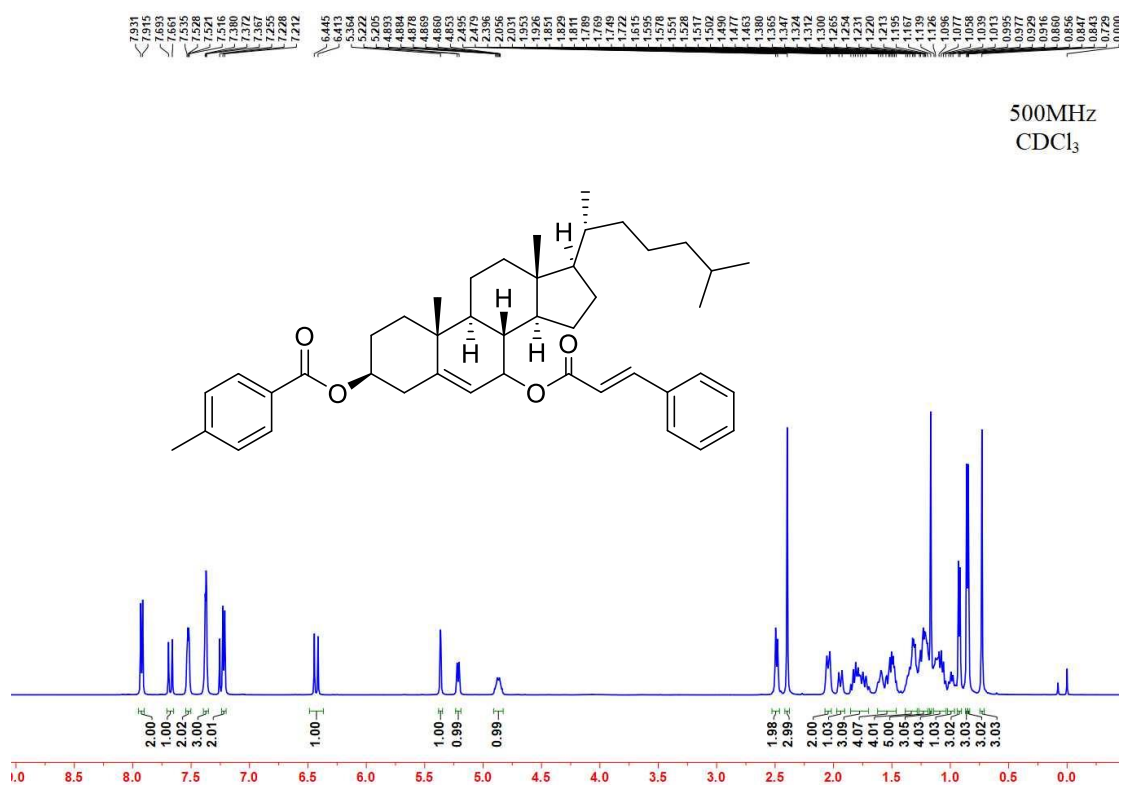

compound *IIId*

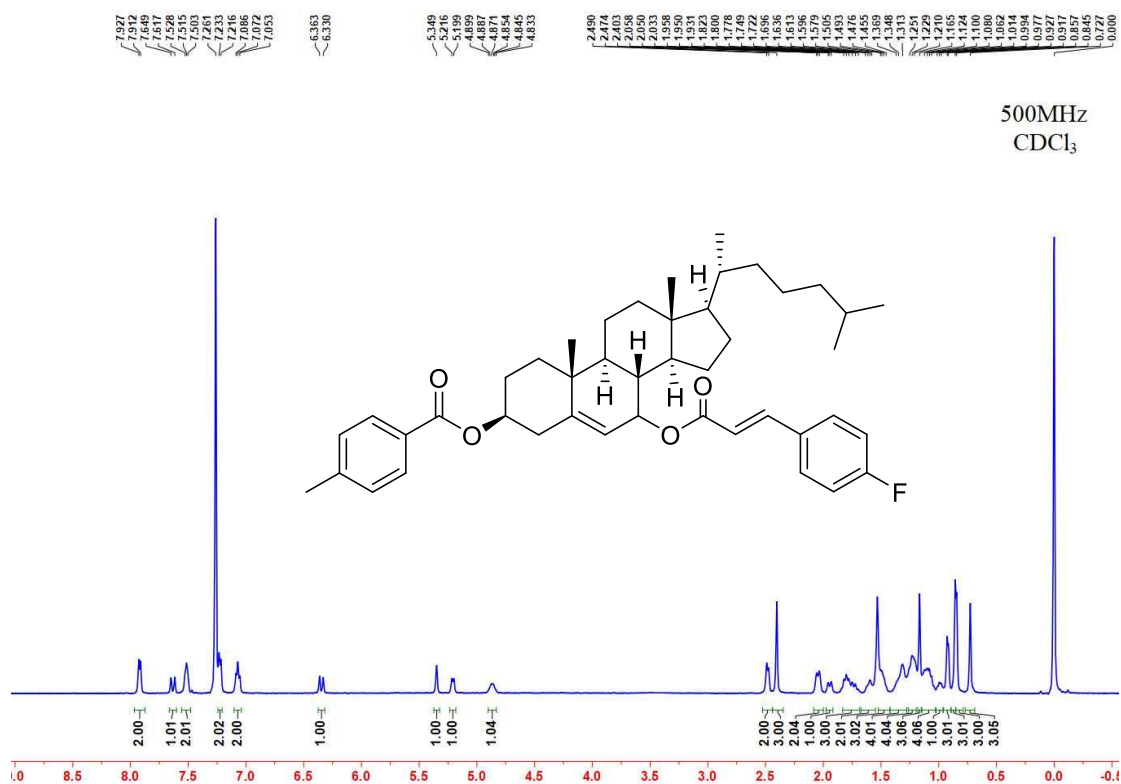

compound *IIe*

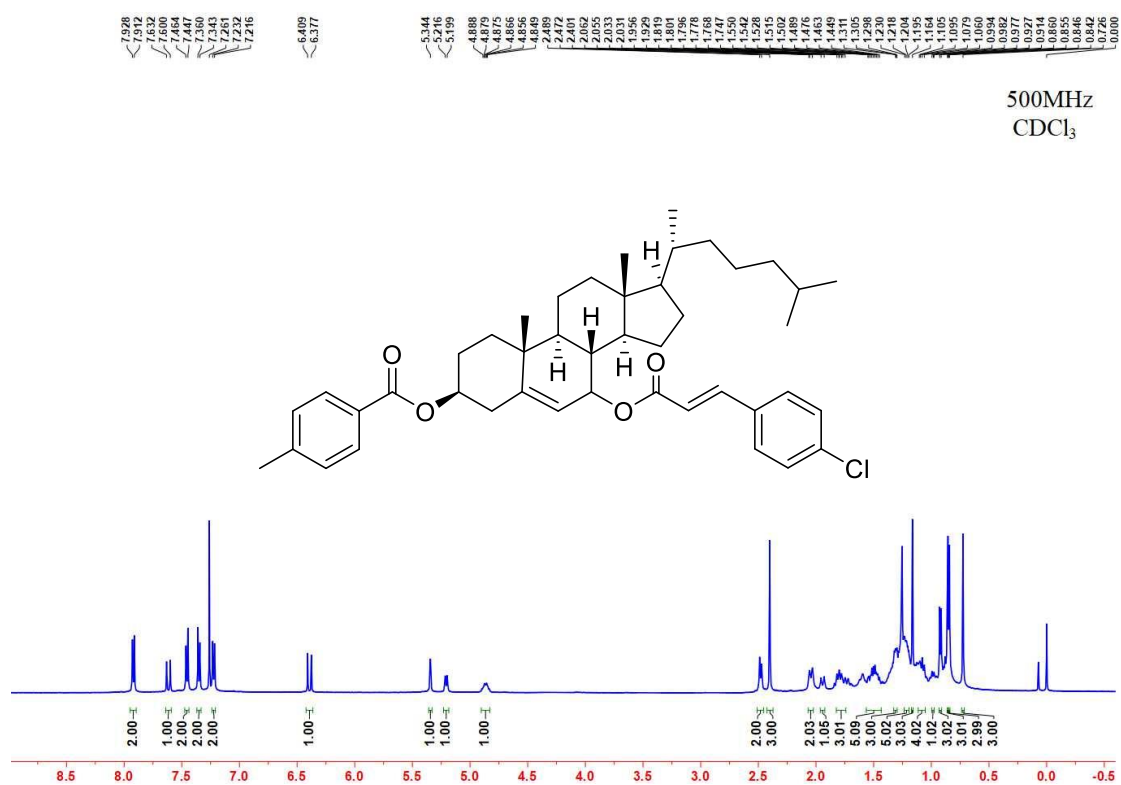

compound *II**f*

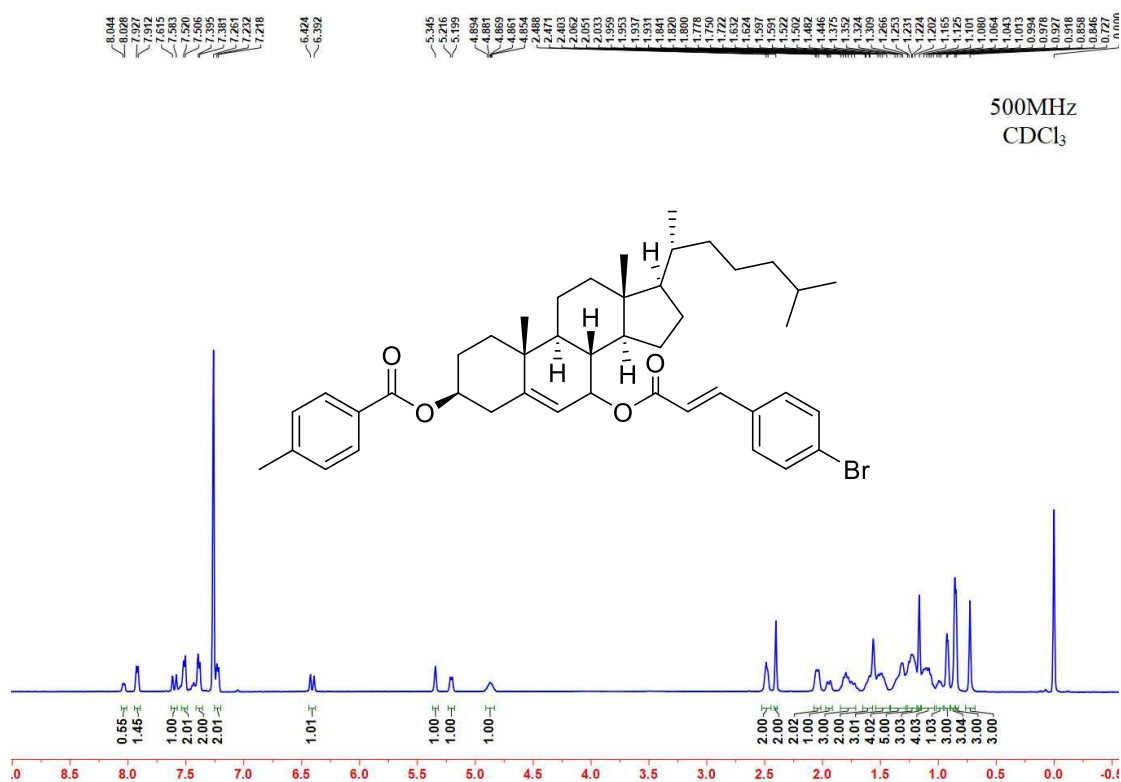

compound *II**g*

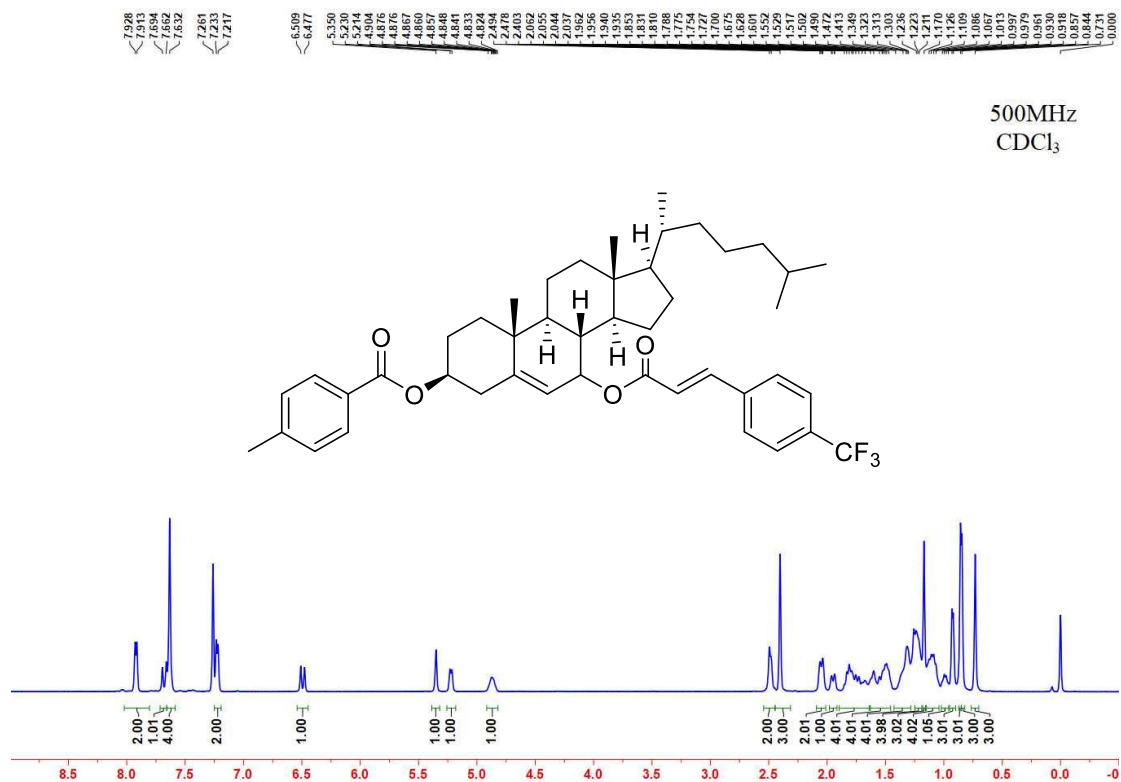

compound *IIIh*

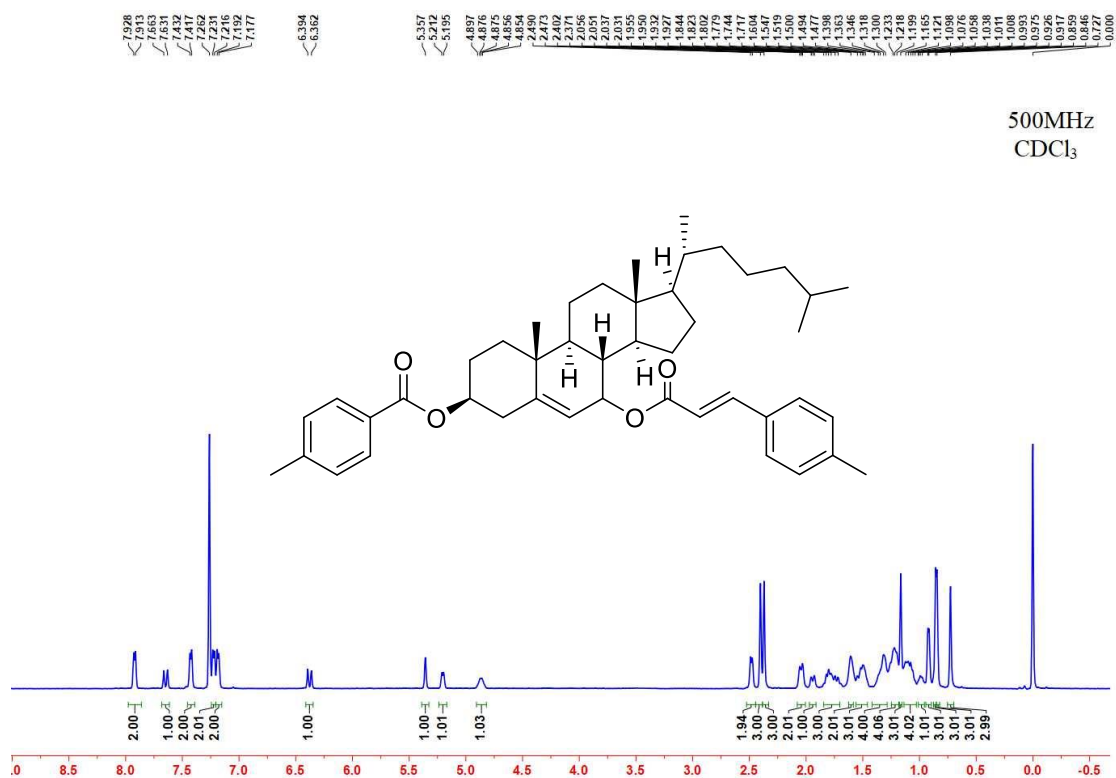

compound *IIIi*

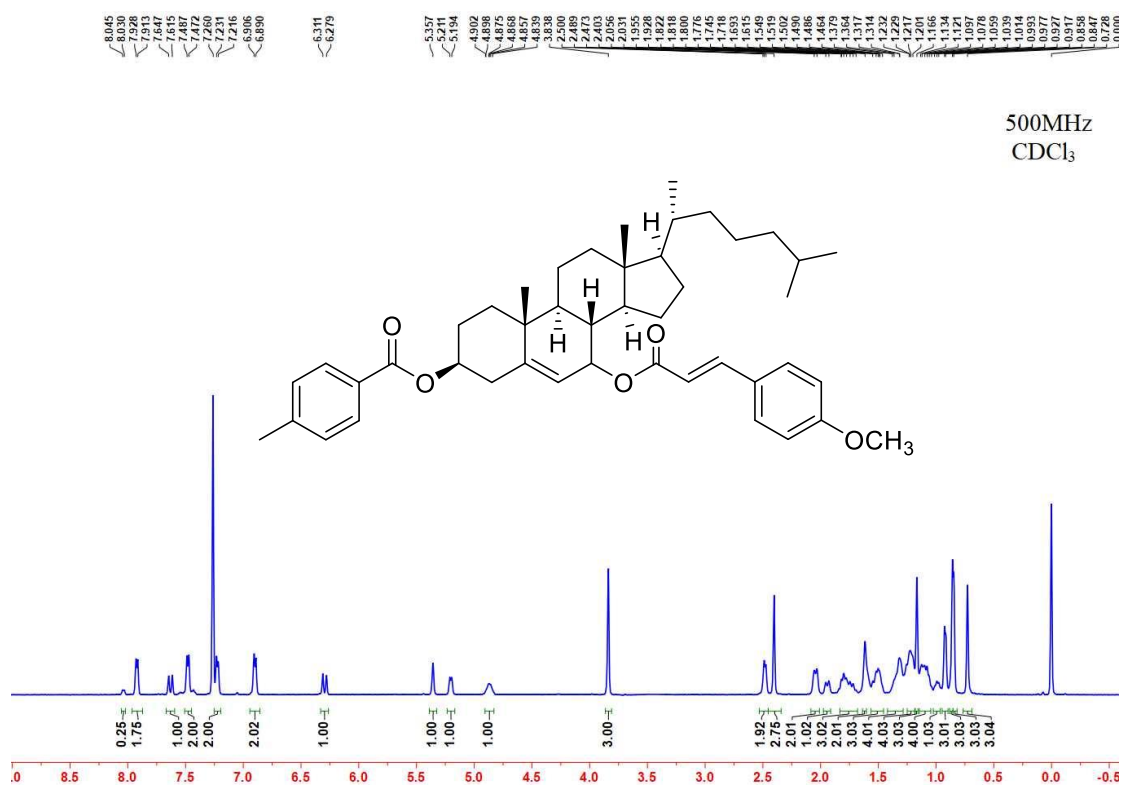

Supplement: s1 [file s1]
